# Supplementary material for: Sciatic nerve regeneration induced by glycosaminoglycan and laminin mimetic peptide nanofiber gels
Source: Royal Society of Chemistry journal article supplement (doi:10.1039/c6ra24450e), 2016-01-01
Supplement: c6ra24450e1.pdf [file c6ra24450e1.pdf]

## **Supplemental Information**

### **Sciatic Nerve Regeneration Induced by Glycosaminoglycan and Laminin Mimetic Peptide Nanofiber Gels**

Busra Mammadov, Melike Sever, Mevhibe Gecer, Fatih Zor, Sinan Ozturk, Hakan Akgun, Umit  
H. Ulas, Zeynep Orhan, Mustafa O. Guler and Ayse B. Tekinay

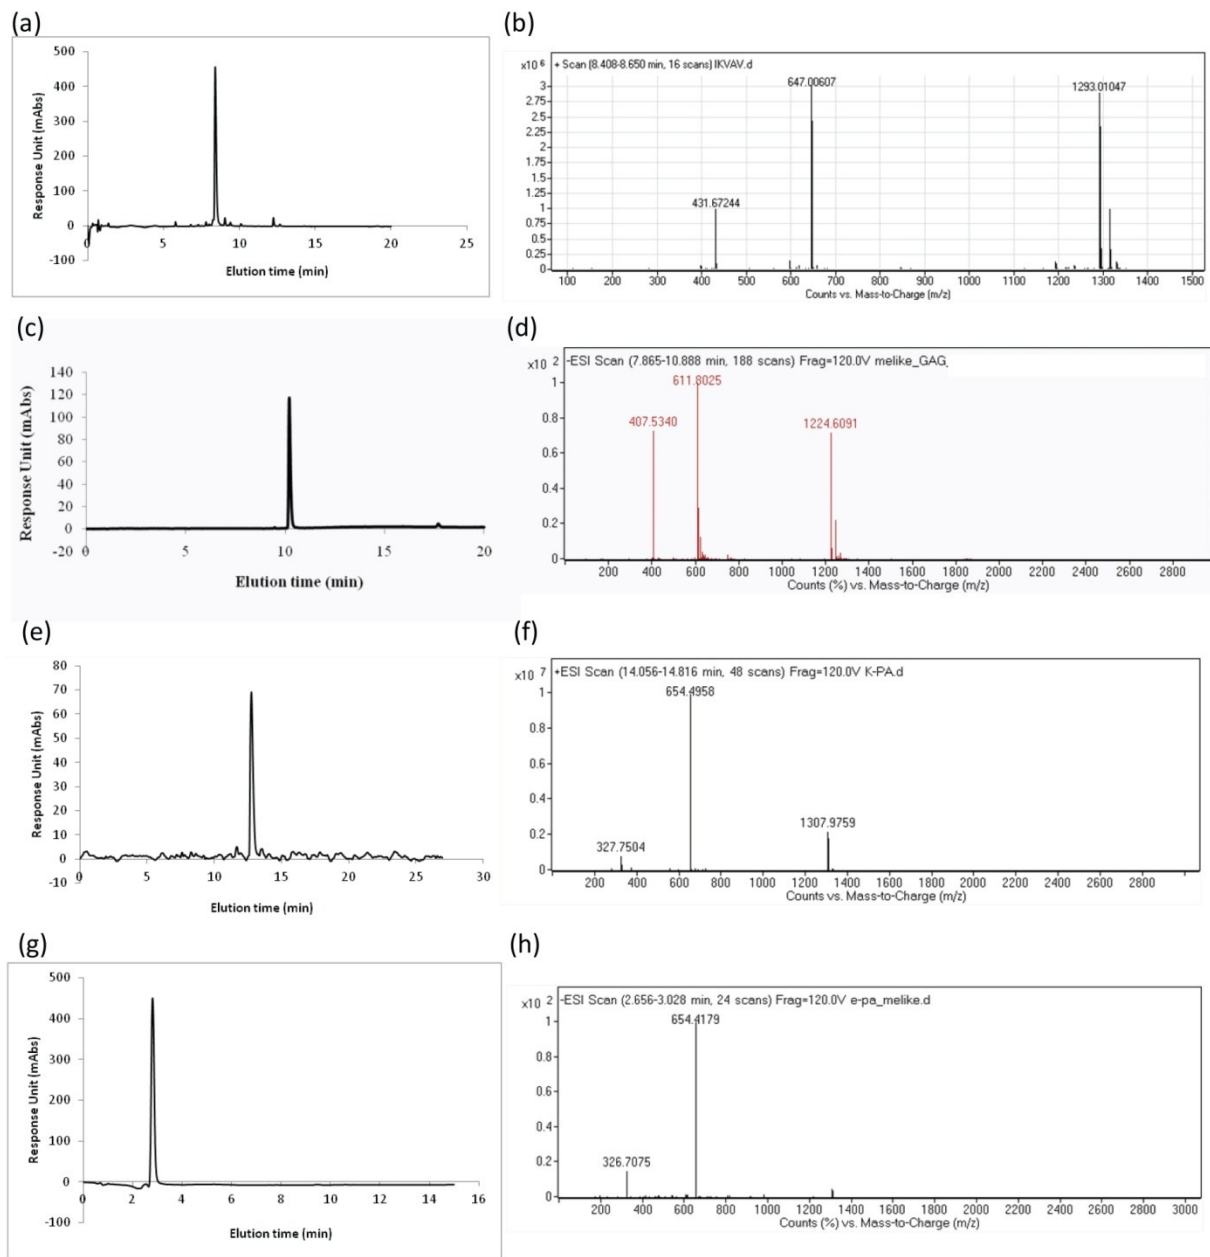

**Figure S1** Liquid Chromatography and Mass Spectroscopy of LN-PA (a,b), GAG-PA (c,d), K-PA (e,f) and E-PA (g,h).

Mass spectrometry of LN-PA;  $[M+H]^+$  (calculated): 1292.93,  $[M+H]^+$  (observed): 1293.01,  $[M+2H]^{+2/2}$  (calculated): 646.96,  $[M+2H]^{+2/2}$ (observed): 647.01,  $[M+3H]^{+3/3}$  (calculated): 431.64,  $[M+2H]^{+2/2}$ (observed): 431.67.

Mass spectrometry of GAG-PA;  $[M-H]^-$  (calculated): 1225.59,  $[M-H]^-$  (observed): 1224.61,  $[M-2H]^{-2/2}$  (calculated): 612.29,  $[M-2H]^{-2/2}$  (observed): 611.80,  $[M-3H]^{-3/3}$  (calculated): 407.86,  $[M-3H]^{-3/3}$  (observed): 407.53.

Mass spectrometry of K-PA;  $[2M+H]^+$  (calculated): 1307.96,  $[2M+H]^+$  (observed): 1307.98,  $[M+H]^+$  (calculated): 654.48,  $[M+H]^+$  (observed): 654.50,  $[M+2H]^{+2/2}$  (calculated): 327.74,  $[M+2H]^{+2/2}$  (observed): 327.75.

Mass spectrometry of E-PA;  $[M-H]^-$  (calculated): 654.42,  $[M-H]^-$  (observed): 654.42,  $[M-2H]^{-2/2}$  (calculated): 326.71,  $[M-2H]^{-2/2}$  (observed): 326.71.

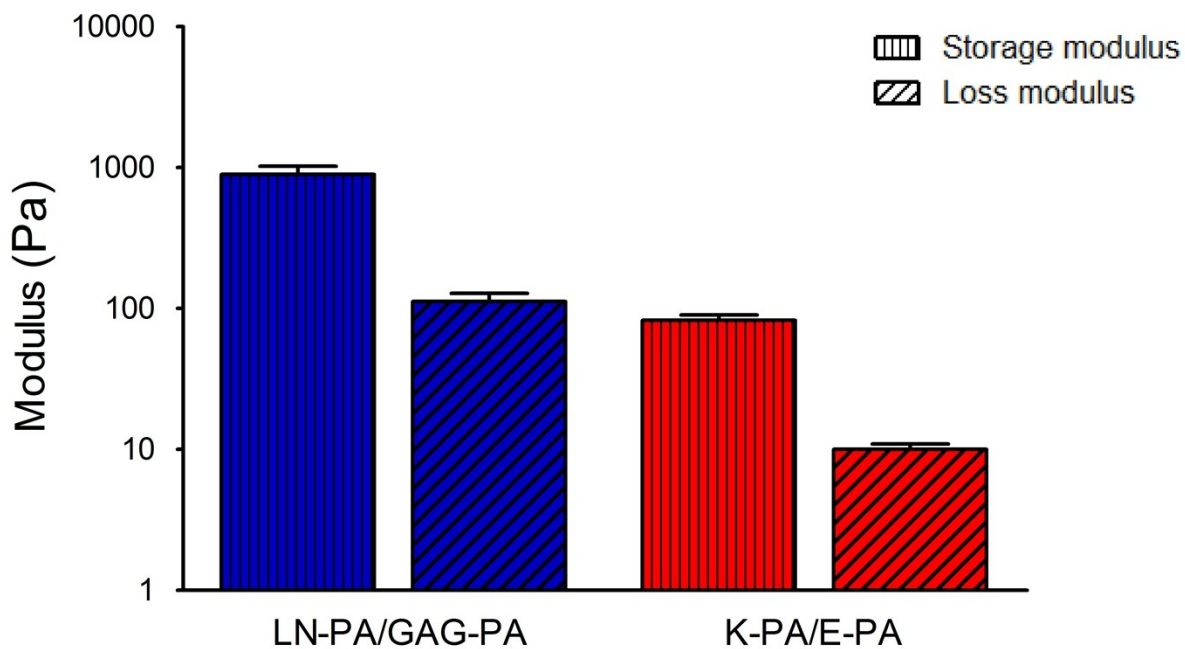

**Figure S2** Characterization of mechanical properties of PA gels.

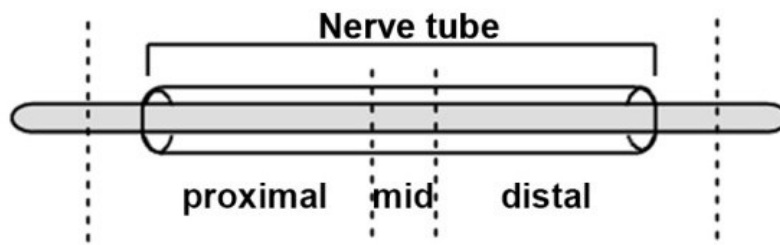

**Figure S3** Excised nerve tissue parts used for different histological analysis. Proximal and distal tissues are embedded in paraffin while mid tissue is embedded in resin for ultrastructure analysis.

**Table S1** Number of rats with digit loss in each experimental group.

| Experimental groups | Number of rats with digit loss |
|---------------------|--------------------------------|
| LN-PA/GAG-PA        | 1                              |
| K-PA/E-PA           | 0                              |
| S                   | 2                              |
| A                   | 4                              |
